# Supplementary material for: Premature infants display discriminable behavioural, physiological and brain responses to noxious and non-noxious stimuli
Source: bioRxiv or medRxiv preprint supplement (doi:10.1101/2021.08.18.21262106), 2021-09-24
Supplement: Supplementary file [file media-1.pdf]

## Supplementary materials for

### Premature infants display discriminable behavioural, physiological and brain responses to noxious and non-noxious stimuli

Marianne van der Vaart, Caroline Hartley, Luke Baxter, Gabriela Schmidt Mellado, Foteini

Andritsou, Maria M. Cobo, Ria Evans Fry, Eleri Adams, Sean Fitzgibbon\* and Rebecca Slater\*

\*These authors contributed equally to this work

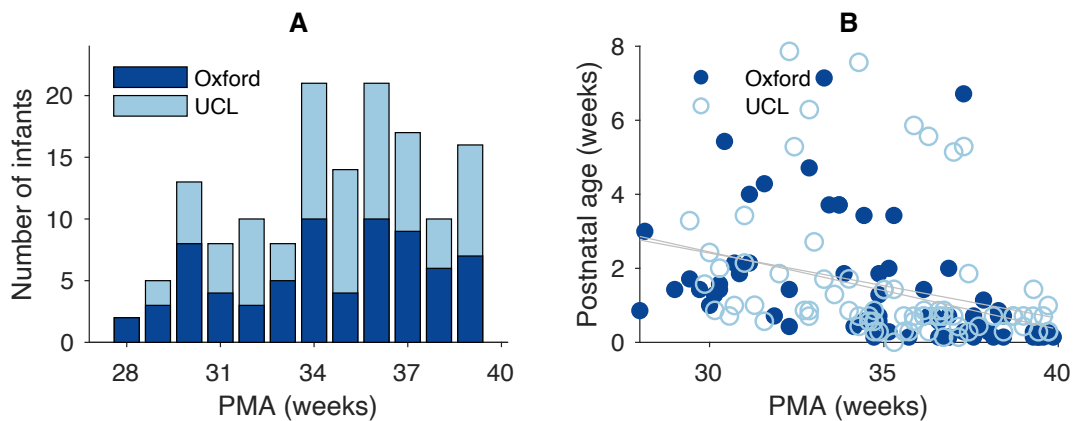

**Figure S1. Age distribution of the Oxford and UCL Datasets.** A) Distribution of postmenstrual age (PMA) in the Oxford Dataset (combined Training and Held-out Test Dataset) and UCL Dataset. B) Relationship between PMA and postnatal age. Grey lines are the lines of best fit in the two datasets.

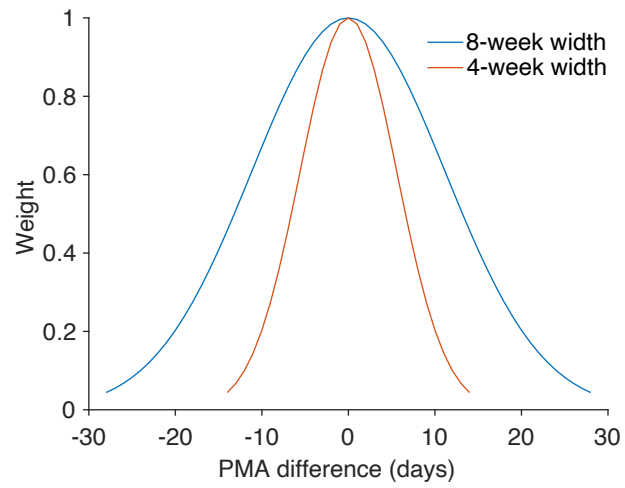

**Figure S2.** Gaussian windows used to assign weights for the calculation of age-weighted averages before the principal component analysis (8-week width) and the age trajectories presented in Figures 4-7 (4-week width).

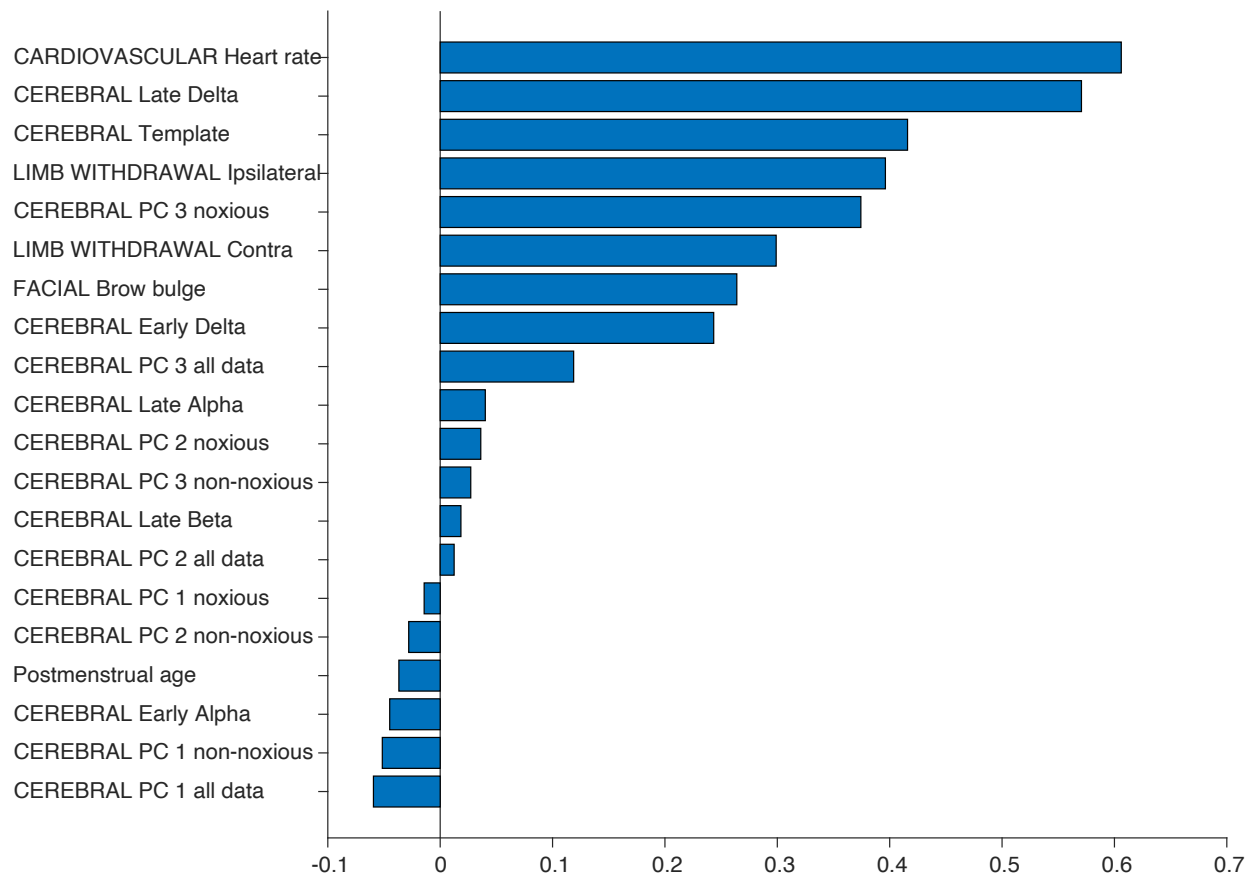

**Figure S3.** Permutation feature importance estimated in the out-of-bag samples in the training data. Abbreviations: PC = principal component.

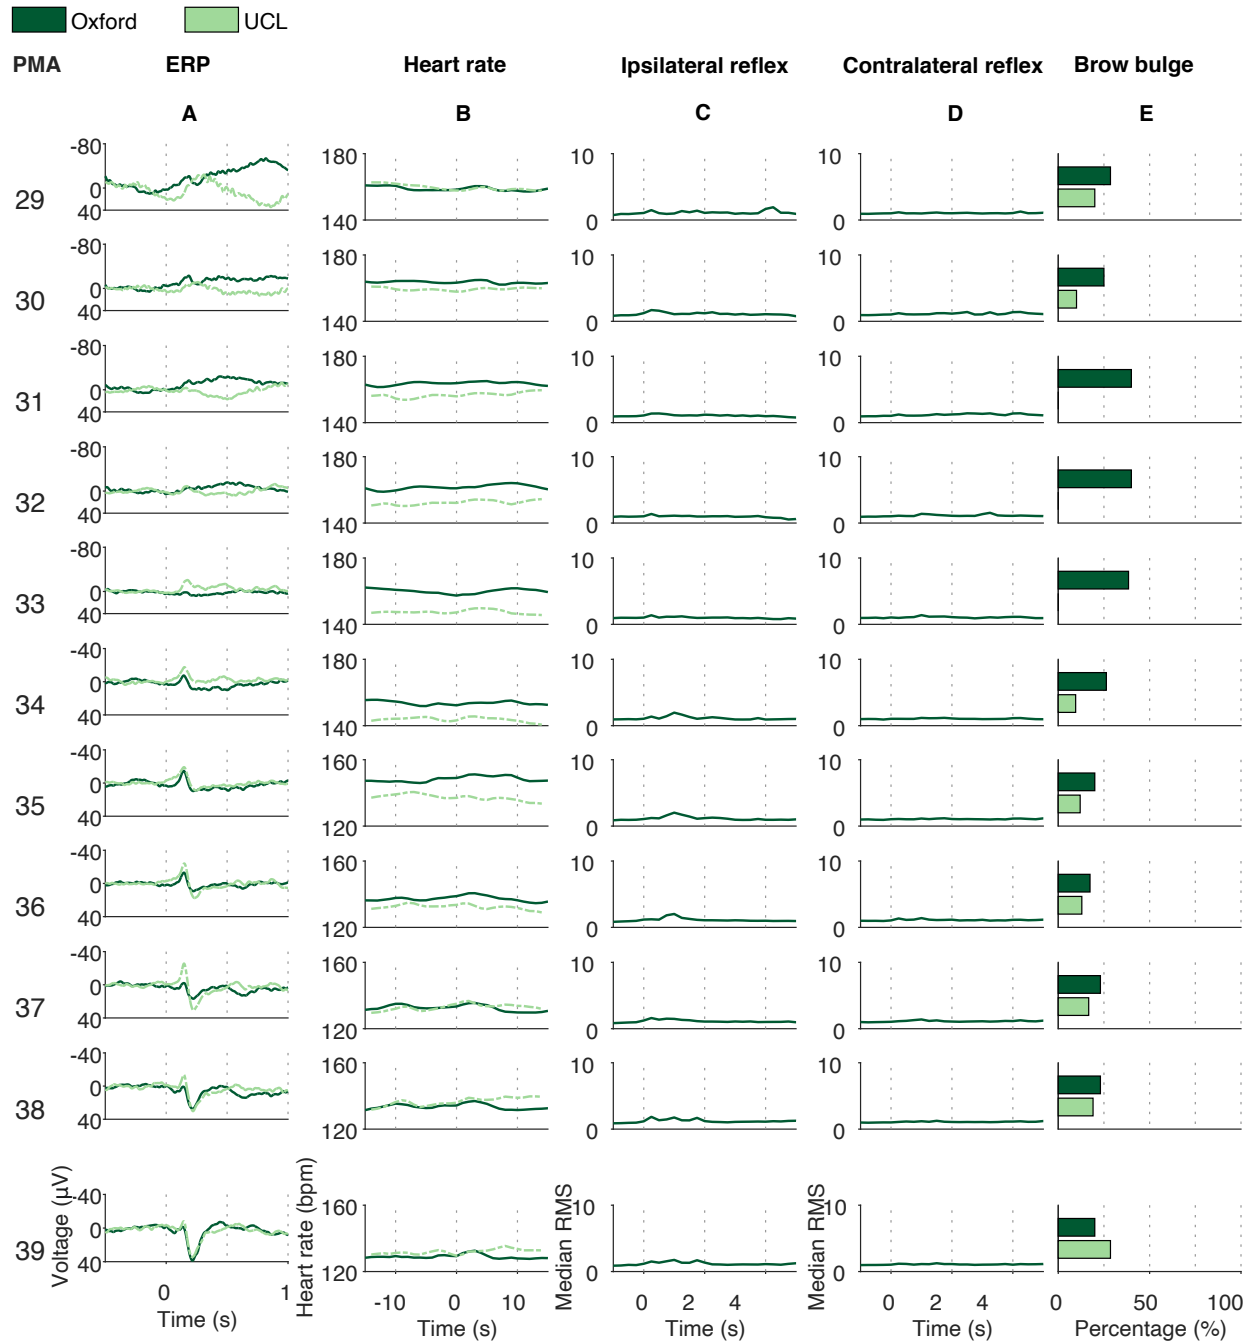

**Figure S4. ERP, heart rate, ipsilateral reflex, contralateral reflex and brow bulge responses to the non-noxious control procedure in neonates from 28-40 postmenstrual weeks, split by postmenstrual week.** For the continuous variables, each trace is an age-weighted average in 4-week sliding windows around the centre PMA. For the brow bulge responses, bars demonstrate the percentage of infants that displayed a brow bulge response in a group of infants with a

PMA that falls within 1.5 weeks relative to the centre PMA. Oxford data contains the Oxford training set and the Oxford Held-out Test Dataset. EMG is not available in the UCL Dataset.

Column A) ERP. Column B) Heart rate. Columns C-D) Ipsilateral and contralateral reflex responses. Column E) Proportion of infants displaying a brow bulge response. Abbreviations:

ERP = event-related potential; PMA = postmenstrual age.

**Table S1.** Regression coefficients and statistics for associations between (left) PMA and noxious-response metrics corrected for PNA, and (right) PNA and noxious-response metrics corrected for PMA. Noxious-response metrics are sorted by p-value for the PMA covariate. Results are consistent with the analyses in the main text. P-values are uncorrected for multiple testing due to the exploratory nature of the analyses. Abbreviations: PC = principal component.

|                      | PMA    |        |         | PNA    |        |       |
|----------------------|--------|--------|---------|--------|--------|-------|
|                      | Beta   | t-stat | p       | Beta   | t-stat | p     |
| PC 1                 | -0.017 | -5.25  | 0.00010 | -0.007 | -1.18  | 0.24  |
| PC 2                 | -0.021 | -5.99  | 0.00010 | 0.006  | 0.96   | 0.33  |
| Heart rate           | 1.60   | 6.40   | 0.00010 | -0.31  | -0.72  | 0.47  |
| PC 3                 | 0.010  | 2.90   | 0.0041  | -0.012 | -1.87  | 0.066 |
| Early Alpha          | -0.47  | -2.46  | 0.018   | 0.38   | 0.96   | 0.35  |
| Late Delta           | 0.49   | 1.98   | 0.056   | 1.14   | 2.25   | 0.028 |
| Early Delta          | -0.38  | -1.86  | 0.071   | 0.63   | 1.51   | 0.14  |
| Late Beta            | 0.35   | 1.54   | 0.14    | 1.23   | 2.62   | 0.010 |
| Late Alpha           | -0.22  | -1.05  | 0.31    | 1.08   | 2.60   | 0.014 |
| Ipsilateral reflex   | -0.21  | -0.98  | 0.33    | -0.63  | -1.34  | 0.18  |
| Contralateral reflex | 0.20   | 0.77   | 0.44    | -0.19  | -0.36  | 0.72  |
